# Supplementary material for: Coupling amorphous cobalt hydroxide nanoflakes on Sr2Fe1.5Mo0.5O5+δ perovskite nanofibers to induce bifunctionality for water splitting
Source: Royal Society of Chemistry journal article supplement (doi:10.1039/d0nr00848f), 2020-01-01
Supplement: d0nr00848f1.pdf [file d0nr00848f1.pdf]

## Supporting Information

### **Coupling amorphous cobalt hydroxide nanoflakes on $\text{Sr}_2\text{Fe}_{1.5}\text{Mo}_{0.5}\text{O}_{5+\delta}$ perovskite nanofibers to induce bifunctionality for water splitting**

Beibei He<sup>\*a</sup>, Kun Tan<sup>a</sup>, Yansheng Gong<sup>a</sup>, Rui Wang<sup>a</sup>, Huanwen Wang<sup>a</sup>,

Ling Zhao<sup>\*a, b</sup>

<sup>a</sup> *Department of Material Science and Chemistry, China University of Geosciences, Wuhan, 430074, China.*

<sup>b</sup> *Zhejiang Institute, China University of Geosciences (Wuhan), Hangzhou, 311305, China*

\*Corresponding author. \*E-mail address: [babyfly@mail.ustc.edu.cn](mailto:babyfly@mail.ustc.edu.cn) (Beibei He)

[zhaoling@cug.edu.cn](mailto:zhaoling@cug.edu.cn) (Ling Zhao)

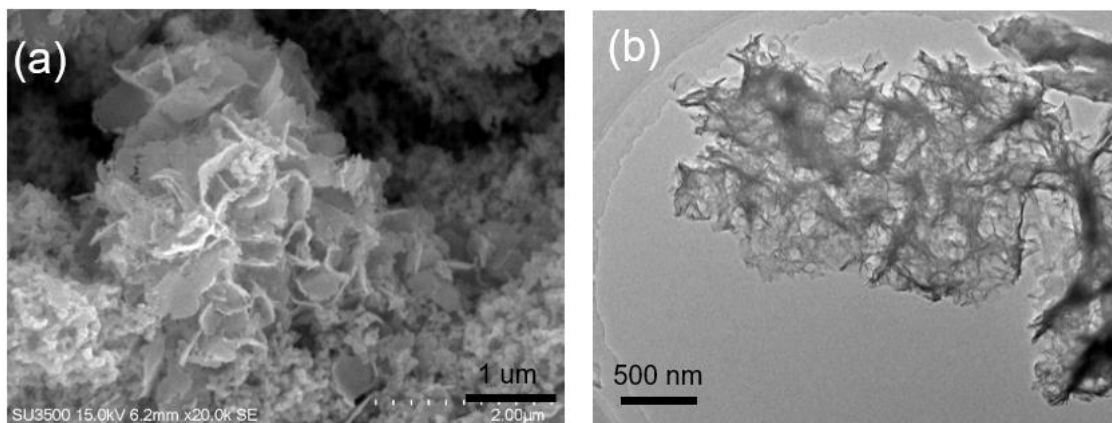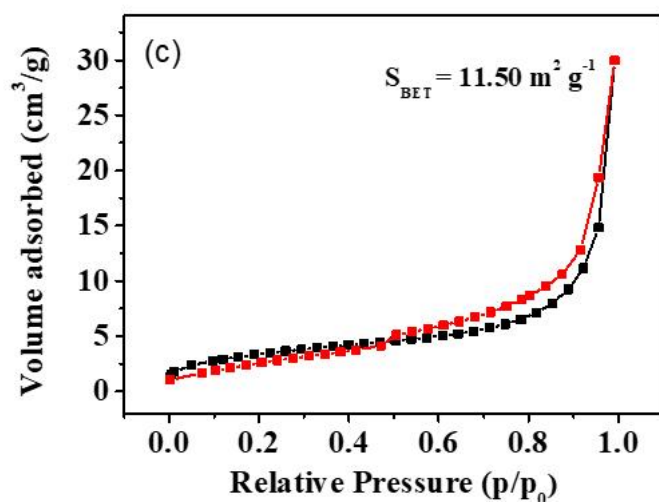

**Figure S1.** (a) SEM and (b) TEM images of Co(OH)<sub>2</sub>, (c) N<sub>2</sub> adsorption-desorption isotherm of Co(OH)<sub>2</sub>.

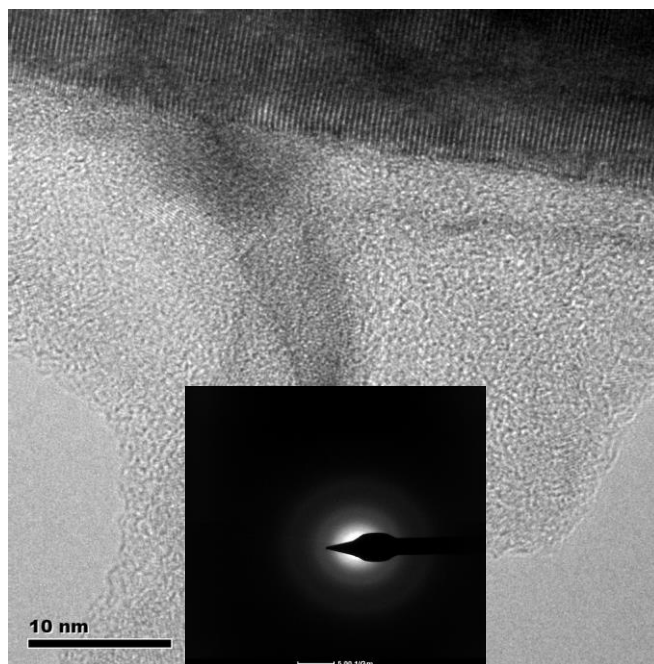

**Figure S2.** TEM images of Co(OH)<sub>2</sub>/SFM-NF sample (inset showing the corresponding SAED pattern).

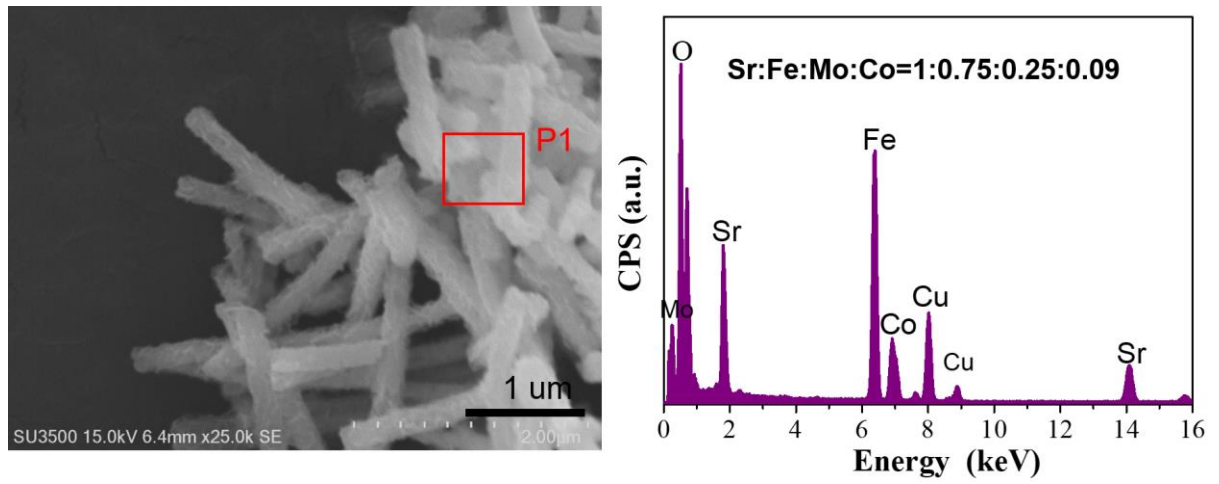

**Figure S3.** EDS spectrum of  $\text{Co(OH)}_2/\text{SFM-NF}$  sample measured at position P1.

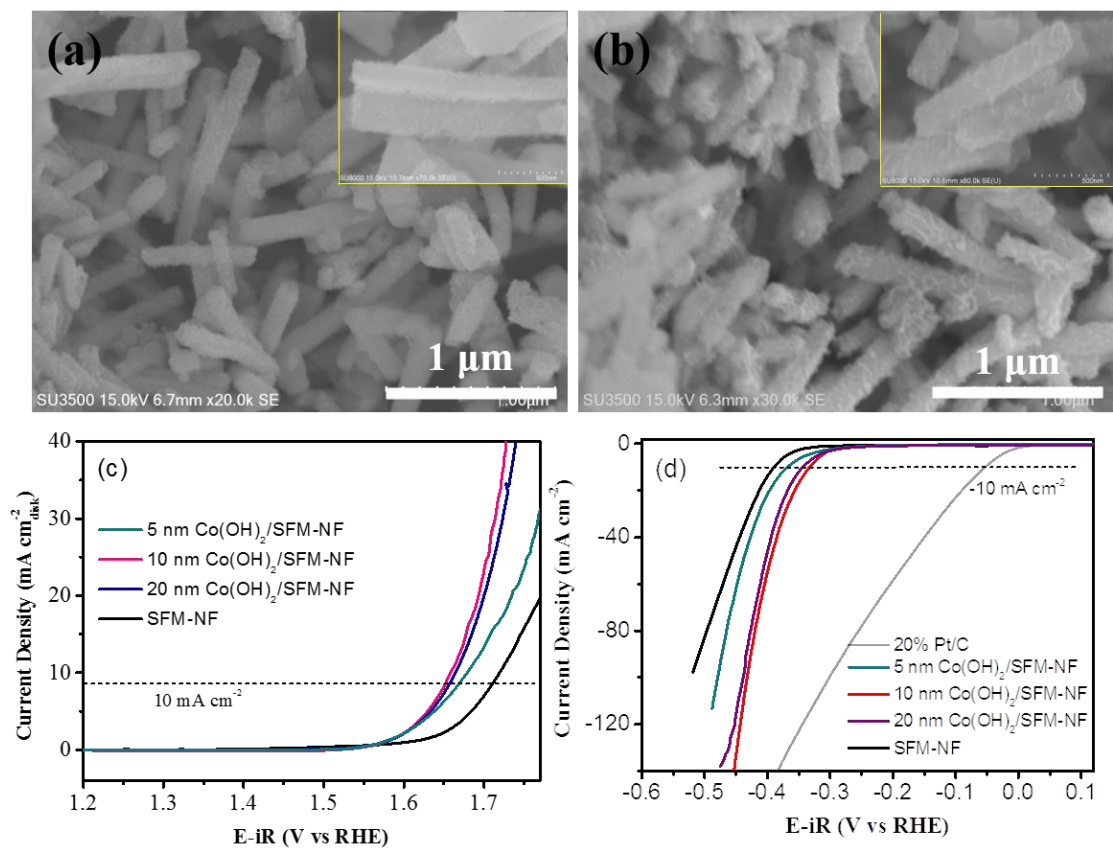

**Figure S4.** SEM images of (a) 5 nm Co(OH)<sub>2</sub>/SFM-NF and (b) 20 nm Co(OH)<sub>2</sub>/SFM-NF; LSV curves of as-prepared samples for (c) OER and (d) HER .

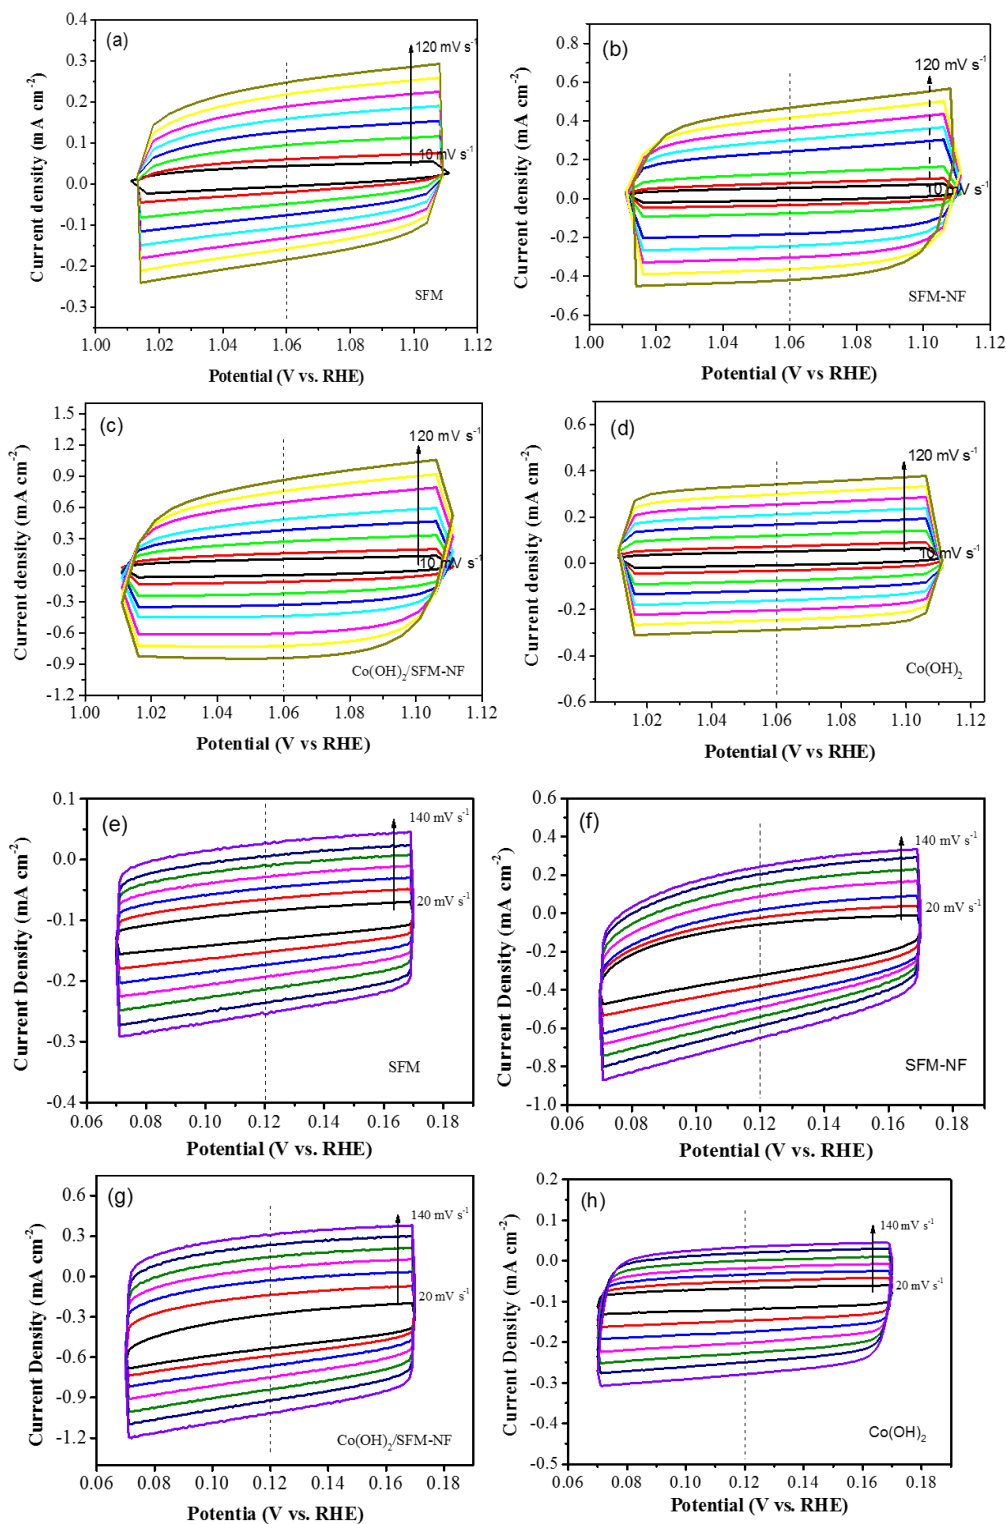

**Figure S5.** CV curves of (a) SFM, (b) SFM-NF, (c) Co(OH)<sub>2</sub>/SFM-NF, (d) Co(OH)<sub>2</sub> measured with different scan rates of 10, 20, 40, 60, 80, 100, 120, and 140 mV s<sup>-1</sup> with a potential of 1.01-1.11 V vs. RHE; CV curves of (e) SFM, (f) SFM-NF, (g) Co(OH)<sub>2</sub>/SFM-NF and (h) Co(OH)<sub>2</sub> measured with a potential of 0.07-0.17 V. vs. RHE.

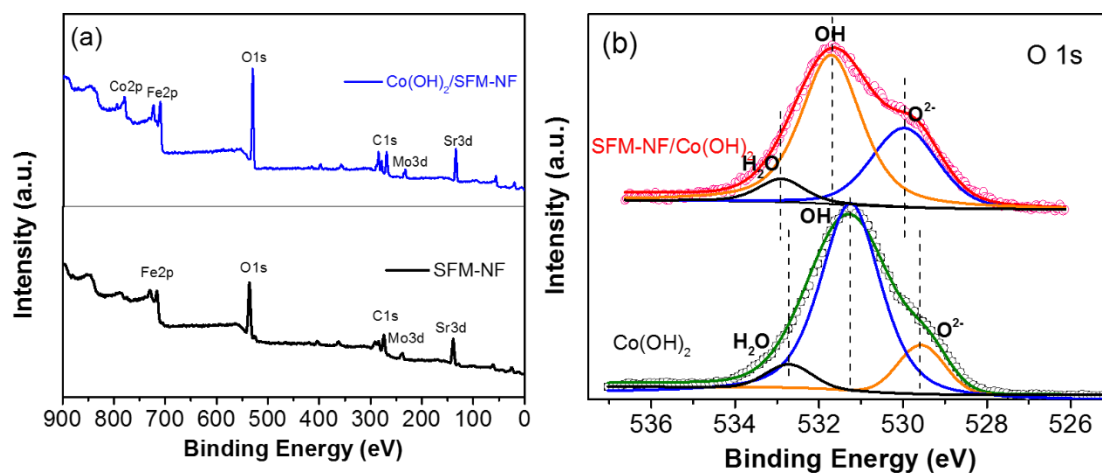

**Figure S6.** (a) Full XPS spectrum of SFM-NF and  $\text{Co(OH)}_2/\text{SFM-NF}$  samples, (b) High resolution XPS spectra of O 1s of  $\text{Co(OH)}_2$  and  $\text{Co(OH)}_2/\text{SFM-NF}$  samples.

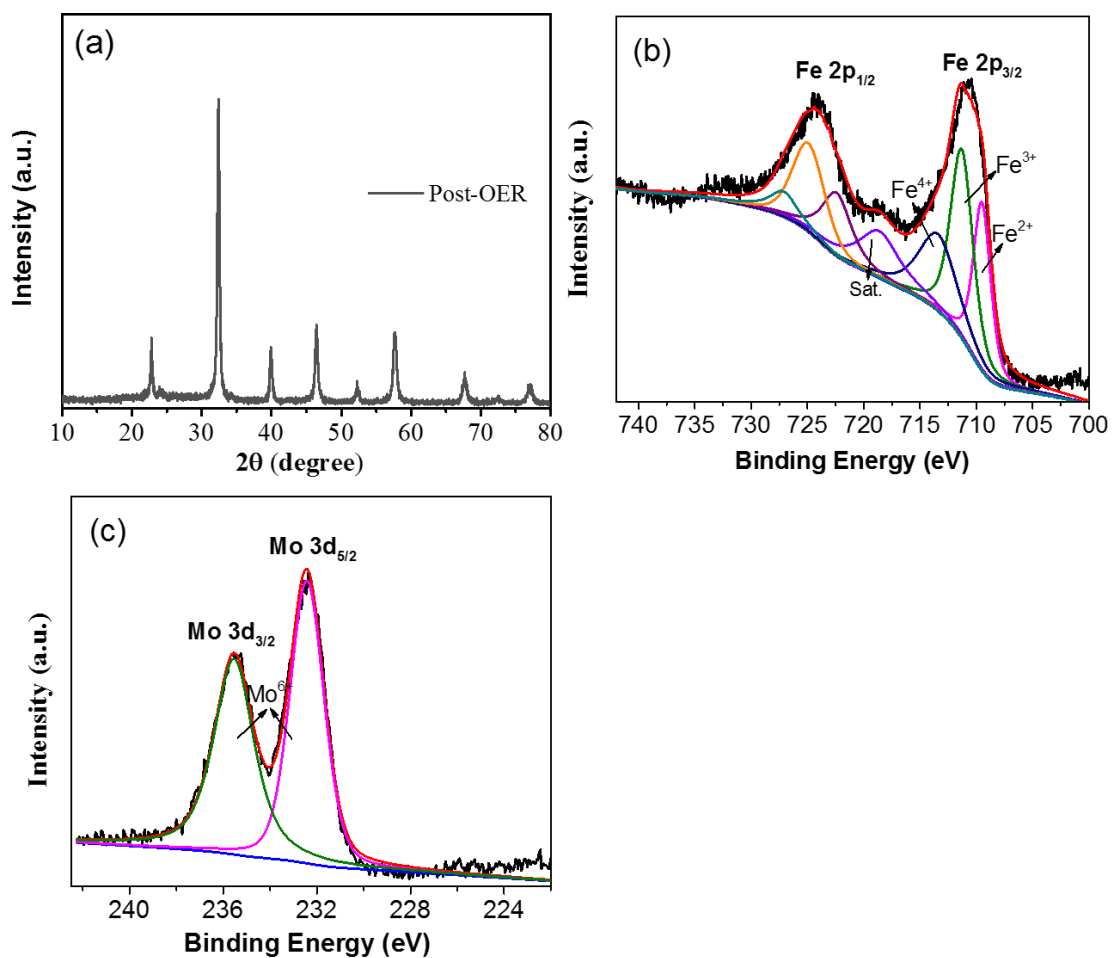

**Figure S7.** (a) XRD pattern of  $\text{Co(OH)}_2/\text{SFM-NF}$  electrode after OER durability test; XPS spectra of (b) Fe 2p and (c) Mo 3d for  $\text{Co(OH)}_2/\text{SFM-NF}$  after OER test.



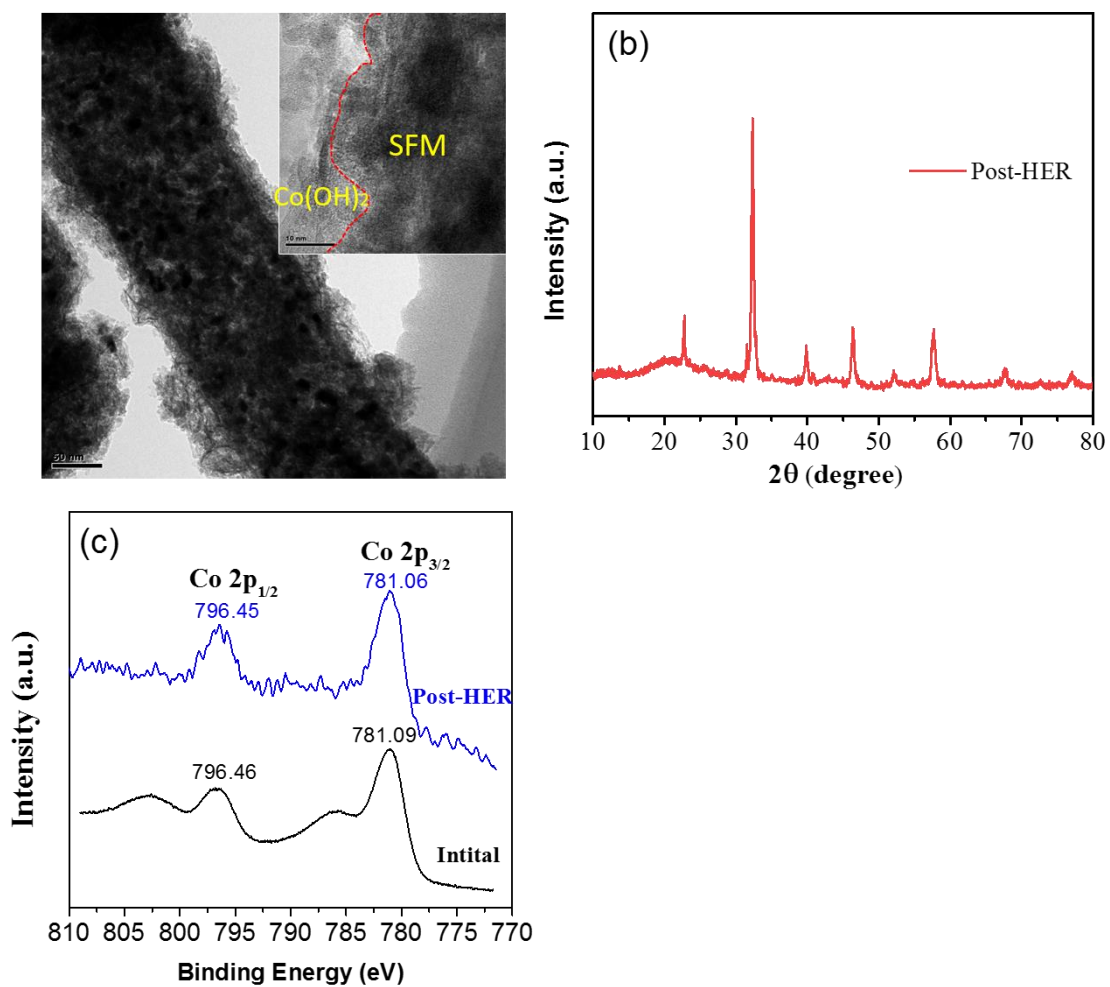

**Figure S8.** (a) TEM images of Co(OH)<sub>2</sub>/SFM-NF electrode after HER durability test, (b) XRD pattern of Co(OH)<sub>2</sub>/SFM-NF electrode after HER durability test, (c) XPS spectra of Co 2p for Co(OH)<sub>2</sub>/SFM-NF before and after HER test.

**Table S1.** Survey of overall water splitting stability with current density and cell voltage of representative bifunctional electrocatalysts in 1 M KOH electrolytes.

| Catalyst                                                                                      | Current density<br>(10 mA cm <sup>-2</sup> ) | Cell voltage<br>(V) | Stability<br>(h) | Reference |
|-----------------------------------------------------------------------------------------------|----------------------------------------------|---------------------|------------------|-----------|
| Pt(-)/IrO <sub>2</sub> (+)                                                                    | 10                                           | 1.58                | 30               | This work |
| Co(OH) <sub>2</sub> /SFM-NF                                                                   | 10                                           | 1.60                | 68               | This work |
| A-PBSCF-H                                                                                     | 10                                           | 1.62                | 12               | 1         |
| SrNb <sub>0.1</sub> Co <sub>0.7</sub> Fe <sub>0.2</sub> O <sub>3-δ</sub> -NR                  | 10                                           | 1.68                | 30               | 2         |
| NiFe LDHs                                                                                     | 10                                           | 1.70                | 10               | 3         |
| NiCo <sub>2</sub> O <sub>4</sub>                                                              | 10                                           | 1.65                | 20               | 4         |
| NiFe/NiCo <sub>2</sub> O <sub>4</sub>                                                         | 10                                           | 1.67                | 10               | 5         |
| NiCo <sub>2</sub> S <sub>4</sub>                                                              | 10                                           | 1.63                | 50               | 6         |
| NdBaMnO <sub>5+δ</sub>                                                                        | 10                                           | 1.67                | 30               | 7         |
| 3DOM-LFC                                                                                      | 10                                           | 1.75                | 12               | 8         |
| La <sub>0.5</sub> Ba <sub>0.25</sub> Sr <sub>0.25</sub> CoO <sub>2.9-δ</sub> F <sub>0.1</sub> | 10                                           | 1.66                | 13.3             | 9         |
| CoNi(OH) <sub>x</sub>                                                                         | 10                                           | 1.67                | 10               | 10        |
| CoMoV LDH                                                                                     | 10                                           | 1.61                | 20               | 11        |
| Co(OH) <sub>2</sub> -NA                                                                       | 10                                           | 1.64                | 20               | 12        |
| Co <sub>0.75</sub> Ni <sub>0.25</sub> (OH) <sub>2</sub> nanosheet                             | 10                                           | 1.57                | 15               | 13        |
| Co <sub>0.9</sub> Fe <sub>0.1</sub> (OH) <sub>x</sub> -NF                                     | 10                                           | 1.62                | 30               | 14        |
| Na <sub>0.08</sub> Ni <sub>0.9</sub> Fe <sub>0.1</sub> O <sub>2</sub>                         | 16                                           | 1.60                | 12               | 15        |
| Co(OH) <sub>2</sub> @Ni                                                                       | 10                                           | 1.64                | 20               | 16        |
| Co(OH) <sub>2</sub> /Ag/FeP                                                                   | 10                                           | 1.56                | 50               | 17        |

## Reference

1. B. Hua, M. Li, Y.-F. Sun, Y.-Q. Zhang, N. Yan, J. Chen, T. Thundat, J. Li and J.-L. Luo, *Nano Energy*, 2017, **32**, 247-254.
2. Y. Zhu, W. Zhou, Y. Zhong, Y. Bu, X. Chen, Q. Zhong, M. Liu and Z. Shao, *Advanced Energy Materials*, 2017, **7**.
3. J. Luo, J.-H. Im, M. T. Mayer, M. Schreier, M. K. Nazeeruddin, N.-G. Park, S. D. Tilley, H. J. Fan and M. Graetzel, *Science*, 2014, **345**, 1593-1596.
4. X. Gao, H. Zhang, Q. Li, X. Yu, Z. Hong, X. Zhang, C. Liang and Z. Lin, *Angewandte Chemie-International Edition*, 2016, **55**, 6290-6294.
5. C. Xiao, Y. Li, X. Lu and C. Zhao, *Advanced Functional Materials*, 2016, **26**, 3515-3523.
6. A. Sivanantham, P. Ganesan and S. Shanmugam, *Advanced Functional Materials*, 2016, **26**, 4661-4672.
7. J. Wang, Y. Gao, D. Chen, J. Liu, Z. Zhang, Z. Shao and F. Ciucci, *Acs Catalysis*, 2018, **8**, 364-371.
8. J. Dai, Y. Zhu, Y. Zhong, J. Miao, B. Lin, W. Zhou and Z. Shao, *Advanced Materials Interfaces*, 2019, **6**.
9. B. Hua, M. Li, W. Y. Pang, W. Q. Tang, S. L. Zhao, Z. H. Jin, Y. M. Zeng, B. S. Amirkhiz and J. L. Luo, *Chem*, 2018, **4**, 2902-2916.
10. S. W. Li, Y. C. Wang, S. J. Peng, L. J. Zhang, A. M. Al-Enizi, H. Zhang, X. H. Sun and G. F. Zheng, *Advanced Energy Materials*, 2016, **6**.
11. J. Bao, Z. L. Wang, J. F. Xie, L. Xu, F. C. Lei, M. L. Guan, Y. Zhao, Y. P. Huang and H. M. Li, *Chemical Communications*, 2019, **55**, 3521-3524.
12. J. Zhang, C. Q. Dong, Z. B. Wang, C. Zhang, H. Gao, J. Z. Niu and Z. H. Zhang, *Electrochimica Acta*, 2018, **284**, 495-503.
13. X. Wang, Z. Li, D. Y. Wu, G. R. Shen, C. Q. Zou, Y. Feng, H. Liu, C. K. Dong and X. W. Du, *Small*, 2019, **15**.
14. Y. X. Liu, Y. W. Li, G. Yuan, J. F. Zhang, X. W. Zhang and Q. F. Wang, *Chemelectrochem*, 2019, **6**, 2415-2422.
15. B. C. Weng, F. H. Xu, C. L. Wang, W. W. Meng, C. R. Grice and Y. F. Yan, *Energy & Environmental Science*, 2017, **10**, 121-128.
16. Z. N. Wang, S. Ji, F. S. Liu, H. Wang, X. Y. Wang, Q. Z. Wang, B. G. Pollet and R. F. Wang, *Acs Applied Materials & Interfaces*, 2019, **11**, 29791-29798.
17. X. T. Ding, Y. G. Xia, Q. N. Li, S. Dong, X. L. Jiao and D. R. Chen, *Acs Applied Materials & Interfaces*, 2019, **11**, 7936-7945.
